# **Caspase-mediated nuclear pore complex trimming in cell differentiation and endoplasmic reticulum stress**

Ukrae H. Cho<sup>1,\*</sup> and Martin W. Hetzer<sup>1,\*</sup>

<sup>1</sup>Molecular and Cell Biology Laboratory, Salk Institute for Biological Studies, La Jolla, CA 92037, USA

\*Correspondence should be addressed to  
U.H.C ([ucho@salk.edu](mailto:ucho@salk.edu)) or M.W.H ([hetzer@salk.edu](mailto:hetzer@salk.edu))

## 1 **Introductory Paragraph**

2           During programmed cell death, caspases degrade 7 out of ~30 nucleoporins (Nups) to  
3 irreversibly demolish the nuclear pore complex (NPC)<sup>1</sup>. However, for poorly understood reasons,  
4 caspases are also activated in differentiating cells in a non-apoptotic manner<sup>2,3</sup>. Here, we describe  
5 reversible, caspase-mediated NPC “trimming” during early myogenesis. We find that sublethal  
6 levels of caspases selectively proteolyze 4 peripheral Nups, Nup358, Nup214, Nup153, and Tpr,  
7 resulting in the transient block of nuclear export pathways. Several nuclear export signal (NES)-  
8 containing focal adhesion proteins concomitantly accumulate in the nucleus where they function  
9 as transcription cofactors<sup>4</sup>. We show that one such protein, FAK (focal adhesion kinase), drives  
10 a global reconfiguration of MBD2 (methyl CpG binding domain protein 2)-mediated genome  
11 regulation. We also observe caspase-mediated NPC trimming during neurogenesis and  
12 endoplasmic reticulum (ER) stress. Our results illustrate that the NPC can be proteolytically  
13 regulated in response to non-apoptotic cues, and call for a reassessment of the death-centric  
14 view of caspases.

15  
16           Caspase-mediated NPC proteolysis has been extensively studied in apoptotic cells<sup>1</sup>. It  
17 enables rapid nuclear translocation of pro-apoptotic proteins such as cytochrome C, caspase-3,  
18 apoptosis-inducing factors, and macrophage migration inhibitory factor<sup>5-8</sup>. However, it remains  
19 unknown whether NPCs are targeted by caspases in differentiating cells where their activation is  
20 sublethal and transient. We therefore assessed Nup degradation in C2C12 cells undergoing  
21 myoblast-to-myotube transition<sup>9</sup>. Strikingly, during the first few days of myogenesis, 4 peripheral  
22 Nups, Nup358, Nup214, Nup153, and Tpr, were reversibly and completely degraded in a  
23 caspase-dependent manner (**Fig. 1a** and **Extended Data Fig. 1a**). Interestingly, Nup96 and  
24 Nup93, which form NPC scaffold and are cleaved by caspases during apoptosis<sup>1</sup>, remained intact  
25 (**Fig. 1a**). This is in line with our previous report that described the persistence of the same Nup96  
26 and Nup93 copies through the course of differentiation<sup>10</sup>. Hence, from the NPC quaternary  
27 structure perspective, caspases trim the cytoplasmic filaments and nuclear basket while sparing  
28 the membrane-traversing Nups, allowing rapid re-assembly of functional NPCs upon their  
29 quenching (**Fig. 1b**). Of note, although calpains, another class of proteases that are activated  
30 during myogenesis<sup>11</sup>, can proteolyze Nups like caspases<sup>12</sup>, calpain inhibition delayed but did not  
31 prevent Nup degradation in differentiating C2C12 cells (**Extended Data Fig. 1a**).

32           The removal of four peripheral Nups has been shown to block nuclear export and cause  
33 nuclear accumulation of RNAs and NES-containing proteins<sup>13-16</sup>. We assessed mRNA export by  
34 combining nuclear isolation and oligo(dT) bead-based poly(A)<sup>+</sup> RNA purification (**Fig. 1c**). The

35 nuclear-to-total mRNA ratio surges from 34% to 60% during differentiation, indicating an  
36 impairment in nuclear export. We then asked if the localization of  $\alpha$ -tubulin is affected (**Fig. 1d**).  
37 In normal conditions, even though tubulin monomers can cross the NPC passive permeability  
38 barrier, they appear completely cytoplasmic due to multiple NESs<sup>17</sup>. Consistently, one day after  
39 switching to differentiation medium, when caspase activity is at its peak and NPCs are partially  
40 disintegrated,  $\alpha$ -tubulin was detectable in the nucleus. We further checked if focal adhesion  
41 proteins with genome-regulatory functions accumulate in the nucleus since they (1) contain one  
42 or more NESs and (2) are likely to be released to the cytoplasm by calpains in differentiating  
43 C2C12 cells<sup>11</sup> and enter the nucleus by passive diffusion or by hitchhiking on their respective  
44 partner transcription factors<sup>4</sup>. Out of five focal adhesion proteins that we examined  
45 (**Supplementary Table 1**), four (Hic-5, zyxin, paxillin, and FAK) transiently became nuclear during  
46 myogenic differentiation (**Fig. 1e**). To confirm that the nuclear accumulation of NES-containing  
47 focal adhesion proteins is a consequence of caspase-mediated NPC trimming, we blocked the  
48 proteolysis of Nups using a pan-caspase inhibitor, Q-VD-OPh (**Fig. 1f**). The nuclear entrapment  
49 of Hic-5, zyxin, paxillin, and FAK was notably suppressed, albeit not fully. The residues can be  
50 ascribed to forced import by partner transcription factors – for example, MBD2 for FAK<sup>18</sup> and  
51 nuclear receptors for Hic-5<sup>19</sup>. In short, differentiation-associated caspase activity blocks nuclear  
52 export and leads to the nuclear retention of NES-containing proteins.

53 While characterizing the caspase-mediated nuclear export shutdown, we identified two  
54 potential mechanisms that can support cell survival during this time window: (1) Nuclear FAK is  
55 known to promote p53 degradation during apoptotic conditions to increase the chance of cell  
56 survival<sup>20</sup>, and we observed a similar p53 reduction coinciding with the nuclear retention of FAK  
57 in differentiating C2C12 cells (**Fig. 1f**); (2) The distribution of housekeeping gene RNAs with  
58 extended half-lives, 18S ribosomal RNA<sup>21</sup> and *Gapdh* transcript<sup>22</sup>, remains unchanged by NPC  
59 breakdown (**Extended Data Fig. 1b**), allowing cells to continuously synthesize essential proteins  
60 over the course of myogenesis.

61 Among the four focal adhesion proteins that accumulate in the nucleus, FAK is particularly  
62 intriguing in that it can facilitate cell survival, migration, cytoskeleton remodeling, and gene  
63 (de)activation, all of which are required for cell differentiation<sup>23</sup>. For example, FAK binds and  
64 removes MBD2 – the main component of the gene-repressive NuRD (nucleosome remodeling  
65 and deacetylation) complex<sup>24</sup> – from methylated CpGs within the *Myog* promoter<sup>18</sup>. We  
66 speculated that the FAK-mediated MBD2 dissociation during myotube formation is not limited to  
67 *Myog* and is rather a genome-wide phenomenon. To test this, we employed CUT&RUN-  
68 sequencing<sup>25</sup> and examined how MBD2-binding landscape changes in differentiating C2C12 cells

69 **(Fig. 2a and Extended Data Fig. 2a)**. In confluent myoblasts, there were 9791 MBD2-bound loci,  
70 but the number plummeted to 354 in 24 hours as expected. Of note, MBD2 protein level stays  
71 constant during this time window, although it is eventually reduced in mature myotubes **(Fig. 2b**  
72 **and Extended Data Fig. 2b)**. After the completion of myogenic differentiation, only few tens of  
73 MBD2 interacting sites were identifiable. We thus conclude that MBD2 genome-binding rapidly  
74 dissolves during myogenesis.

75 MBD2 overexpression has been reported to cause heterochromatin clustering like its  
76 cousin, MeCP2 (methyl CpG-binding protein 2)<sup>18,26</sup>. However, we find that at the endogenous  
77 levels, only MeCP2 localizes to the chromocenters in myotubes and that MBD2 does not spatially  
78 overlap with MeCP2 **(Extended Data Fig. 2c and d)**, indicating that the two methyl CpG-binding  
79 proteins carry out disparate tasks. To better understand MBD2 in the context of myogenesis, we  
80 further analyzed MBD2 CUT&RUN-sequencing data from confluent myoblasts (Day 0 in **Fig. 2a**).  
81 About a quarter of the peaks were in promoters, roughly one-third in introns, and another one-  
82 third in distal intergenic regions **(Extended Data Fig. 3a)**. Intense peaks were predominantly  
83 located within promoters **(Extended Data Fig. 3b)**, and strikingly, the gene ontology (GO) term  
84 analysis revealed that MBD2 primarily targets the promoter of the genes that have a direct link to  
85 myogenic differentiation, with actin cytoskeleton organization (GO: 0030036) and muscle  
86 structure development (GO: 0061061) genes being the top 2 categories **(Fig. 2c, see Extended**  
87 **Data Fig. 3c** for the GO analysis of the entire MBD2 target genes). *Mylpf* (myosin light chain,  
88 phosphorylatable, fast skeletal muscle), whose mutation recently has been shown to cause a  
89 familial segmental amyoplasia<sup>27</sup>, is one noteworthy example **(Extended Data Fig. 3d)**. In short,  
90 MBD2 binds, and potentially regulates, cell identity genes in muscle cells.

91 We then evaluated how transcription changes after MBD2 is removed from the promoters.  
92 Considering that most MBD2-bound promoters are already tri-methylated at Histone H3 lysine 4  
93 in myoblasts **(Extended Data Fig. 4a and b)**, we expected that MBD2-target genes would be  
94 upregulated after MBD2 dissociation, or the loss of the NuRD complex. However, RNA-  
95 sequencing revealed that out of 1508 genes, only 218 exhibit >2-fold increase in transcript levels  
96 whereas 336 show >2-fold decrease **(Fig. 2d and Extended Data Fig. 4c)**. It is possible that  
97 other gene repressing mechanisms – such as non-MBD2 methyl CpG binding proteins,  
98 heterochromatin reorganization, and gene-specific repressors – are taking over during  
99 myogenesis.

100 To summarize, caspase-mediated NPC trimming coincides with nuclear sequestration of  
101 NES-containing proteins, which can be transformative as in the case of FAK or inconsequential  
102 (presumably) as in the case of  $\alpha$ -tubulin **(Fig. 2e)**. Our finding agrees with a previous

103 immunofluorescence-based study<sup>28</sup> that described (1) the transient nuclear translocation of an  
104 NES-containing E3 ligase Nedd4 during myogenesis, which causes Pax7 degradation, and (2)  
105 the 2- to 3-fold enhancement of myogenin activation in the presence of leptomycin b, an exportin-  
106 1 inhibitor. We validated that a partial dose of leptomycin b increases myogenin at 24 hours post-  
107 differentiation (**Extended Data Fig. 4d**).

108 We then sought to determine how caspases are sublethally activated during myogenic  
109 differentiation. We surmised that caspase-inhibiting proteins could be downregulated to facilitate  
110 caspase activation. Among eight inhibitors of apoptosis proteins (IAPs), cIAP-1/2, XIAP, and  
111 survivin are most extensively studied and considered the major caspase counteractors<sup>29</sup>. The  
112 XIAP and survivin can be regulated by the Notch signaling pathway<sup>30,31</sup>, which plays a key role in  
113 myogenesis. We monitored the expression of these IAPs over the course of differentiation in the  
114 absence or presence of DAPT, a  $\gamma$ -secretase inhibitor that blocks the release of the Notch  
115 intracellular domain (**Fig. 3a**). We noted two intriguing points. First, survivin was dramatically  
116 downregulated in the first 24 hours. Second, none of the examined IAP levels were affected by  
117 DAPT treatment. This indicates that Notch signaling does not control these proteins during  
118 myogenesis.

119 To validate that survivin downregulation amplifies caspase-3 activity, we incubated  
120 HCT116 cells with 1541B and/or YM155, chemicals that catalyze the proteolytic processing of  
121 procaspase-3<sup>32</sup> or inhibits survivin transcription in cancer cells<sup>33</sup>, respectively (**Extended Data**  
122 **Fig. 5a**). 1541B gave rise to the active form of caspase-3 and induced the degradation of Tpr,  
123 Nup153, and PARP (poly (ADP-ribose) polymerase) as well as cIAP-1 and XIAP<sup>34,35</sup>, all of which  
124 were accelerated and enhanced when 1541B was used in combination with YM155. (YM155  
125 alone decreases survivin, but not cIAP-1/2 and XIAP, and does not activate caspase-3.) This  
126 suggests that survivin suppression can potentiate caspase-3 activity.

127 We also discovered that calpain inhibition delays, but does not prevent, the activation of  
128 caspase-3 and -12 and the degradation of peripheral Nups and PARP (**Extended Data Fig. 1a**  
129 and **Extended Data Fig. 5b**). This signifies that, while calpains are upstream of caspases, there  
130 is another caspase activation pathway. Given that unfolded protein response is triggered in  
131 differentiating C2C12 cells<sup>36</sup>, we surmise that procaspase-12 is processed by IRE1 and TRAF2  
132 and converts procaspase-3 to its active form (p17) as in ER stress conditions<sup>37,38</sup>.

133 Next, we examined the relationship between caspase activation and myogenin, the main  
134 driver of myotube formation (**Fig. 3b**). To this end, we generated a C2C12 stable cell line that  
135 expresses green fluorescent protein (GFP)-fused myogenin in a doxycycline-dependent manner.  
136 Exogenous myogenin accelerated by a day the upregulation of myosin heavy chain (MHC), and

137 more importantly, the reduction of active caspase-3, suggesting that a caspase-quenching  
138 pathway exists and is activated once myoblasts pass a certain differentiation stage. Caspase  
139 inhibition prevented the expression of myogenin, and thus MHC, as previously reported<sup>9</sup>. We then  
140 asked whether differentiation blockage by caspase inhibition can be overridden by exogenous  
141 myogenin (**Fig. 3b**). Doxycycline-induced expression of GFP-myogenin enabled the upregulation  
142 of both endogenous myogenin and MHC even when a pan-caspase inhibitor was present. (The  
143 myotubes, however, appeared not as robust as the ones formed in the presence of DMSO or  
144 doxycycline alone; data not shown). This demonstrates that the key function of caspases is to  
145 upregulate myogenin, the master regulator, and that the proteolyses of other targets are ancillary  
146 events that render cells amenable for differentiation.

147 Finally, we explored whether the proteolytic processing of caspase-3 is linked to the  
148 phosphatase activity of calcineurin (**Fig. 3c**), as it is required for the nuclear translocation of NFAT  
149 (nuclear factor of activated T-cells) and the transcriptional activation of myogenin<sup>39</sup>. We  
150 differentiated C2C12 cells in the absence or presence of FK506, a macrolide that suppresses  
151 calcineurin activity, and found that the p17 form of caspase-3 arises even when FK506 is used at  
152 the highest dose and when myogenin upregulation is subdued. This result illustrates that the  
153 calcineurin/NFAT/myogenin pathway is orthogonal to the caspase/myogenin pathway. **Fig. 3d**  
154 summarizes our working model. Taken together, we have identified a new cascade – (1) caspase  
155 activation, (2) peripheral Nup degradation, (3) nuclear retention of NES-containing proteins – that  
156 regulates the expression of myogenin<sup>24</sup>, Pax7<sup>28</sup>, and other myogenesis-related genes (**Fig. 2e**  
157 and **Fig. 3d**).

158 To test that caspase-mediated NPC trimming is not a myogenesis-specific phenomenon,  
159 we differentiated H9 embryonic stem cell-derived neural precursor cells into mature, post-mitotic  
160 neurons, and looked into caspase-related events (**Fig. 4a**). As in myogenic differentiation, survivin  
161 is highly expressed in precursor cells but undetectable in mature neurons. cIAP-1/2 is modestly  
162 reduced while XIAP remains constant. The processing of caspase-3 to the p17 form and the  
163 proteolysis of Nup153 and PARP were observed concomitantly. In short, the same processes  
164 occur during neuronal differentiation, but over a longer duration.

165 We also tested whether partial NPC disintegration takes place during ER stress since the  
166 calpain/caspase activation pathway in unfolded protein response is similar to that in myogenesis  
167 (**Fig. 3d**). C2C12 myotubes, reserve cells, and myoblasts were treated with 1 µg/mL tunicamycin  
168 (**Fig. 4b**). Active caspase-3 arose in all three cell types and Tpr and Nup153 degradation was  
169 recognizable by 18 hours in C2C12 myoblasts and reserve cells; however, in myotubes, the two  
170 Nups were fully proteolyzed in less than 6 hours. The result can be attributed to the difference in



171 survivin and XIAP expression levels, both of which are lowest in myotubes at 0 hour. (Furthermore,  
172 XIAP in myotubes migrates faster than that in reserve cells or myoblasts during gel  
173 electrophoresis, possibly due to the dephosphorylation of Ser87, which is known to stabilize  
174 XIAP<sup>40</sup>.) We conclude that NPC trimming occurs during ER stress at varying rates in different cell  
175 types. Of note, Nup93, a scaffold Nup, remained unaffected as in myogenesis, showing that it is  
176 better protected from caspases compared to peripheral Nups. Additionally, we tested whether  
177 low-level but sustained ER stress can induce the same phenotype in C2C12 myotubes (**Fig. 4c**).  
178 In fact, several myopathies involve chronic – rather than acute – ER stress and caspase  
179 activation<sup>41</sup>. We maintained differentiated C2C12 cells at low doses of tunicamycin (<50 ng/mL)  
180 for a week, and as in differentiating myoblasts (**Fig. 1a**) and acutely ER-stressed myotubes (**Fig.**  
181 **4b**), major peripheral Nups were noticeably degraded while the breakdown of Nup93 was minimal.  
182 NPC trimming may contribute to cellular homeostasis loss in muscular diseases that accompany  
183 ER stress (**Fig. 4d**).

184 In summary, our study demonstrates that the NPC cytoplasmic filaments and nuclear  
185 basket are transiently removed by caspases in differentiating and ER-stressed cells. This process  
186 is distinct from terminal NPC destruction in apoptosis. Caspase-mediated NPC trimming is a  
187 reversible process that, for a set period during differentiation, impairs nuclear export. We found  
188 that during myogenesis, it is exploited to increase the nuclear levels of focal adhesion proteins  
189 that can double as transcription cofactors and to reconfigure the transcriptional profile of  
190 myoblasts. In addition, NPC trimming could reset NPC-genome interaction during cell  
191 differentiation. NPCs bind and regulate cell identity genes<sup>42</sup>, and transient proteolysis of the  
192 nuclear basket can be an elegant reinitialization mechanism. During ER stress, the same  
193 phenomenon can potentially be utilized to curtail mRNA export, thereby reducing the protein  
194 synthesis/folding load in the ER. While we primarily focused on the NPC, the degradation of other  
195 caspase substrates might promote cell differentiation in their own ways. For example, caspases  
196 target several cytoskeletal proteins (e.g.  $\alpha$ -spectrin in **Fig. 1a**), which can accelerate cell  
197 morphological change. Proteolytic inactivation of transcription factors<sup>43,44</sup> and translation-related  
198 proteins can also be conducive for transcriptome and proteome turnover. Our findings support  
199 the idea that caspases initially evolved to change cell morphology, behavior, and identity, and that  
200 apoptosis is rather an extreme form of caspase-mediated cellular transformation<sup>2,3</sup>.

201 **Acknowledgments**

202 We thank the members of the Hetzer lab and Jongmin Kim (Massachusetts General  
203 Hospital) for the critical reading of the manuscript; Kenneth Diffenderfer and Aimee Pankonin  
204 (Stem Cell Core Facility at the Salk Institute) for help with neurogenesis; Carol Marchetto and  
205 Fred Gage (the Salk Institute) for providing H9 embryonic stem cells. This work was supported  
206 by a Glenn Foundation for Medical Research Postdoctoral Fellowship in Aging Research (U.H.C.),  
207 the NOMIS foundation (M.W.H), and the National Institutes of Health (R01 NS096786 to M.W.H.).  
208

209 **Author contributions**

210 U.H.C. performed experiments. U.H.C. and M.W.H. conceived the study and wrote the  
211 manuscript.

212

213 **Competing financial interests**

214 The authors declare no competing financial interests.



## References

- 215  
216  
217 1 Patre, M. *et al.* Caspases target only two architectural components within the core structure  
218 of the nuclear pore complex. *J Biol Chem* **281**, 1296-1304 (2006).
- 219 2 Connolly, P. F., Jager, R. & Fearnhead, H. O. New roles for old enzymes: killer caspases as  
220 the engine of cell behavior changes. *Front Physiol* **5**, 149 (2014).
- 221 3 Burgon, P. G. & Megeney, L. A. Caspase signaling, a conserved inductive cue for metazoan  
222 cell differentiation. *Semin Cell Dev Biol* **82**, 96-104 (2018).
- 223 4 Hervy, M., Hoffman, L. & Beckerle, M. C. From the membrane to the nucleus and back again:  
224 bifunctional focal adhesion proteins. *Curr Opin Cell Biol* **18**, 524-532 (2006).
- 225 5 Diaz-Moreno, I., Velazquez-Cruz, A., Curran-French, S., Diaz-Quintana, A. & De la Rosa, M.  
226 A. Nuclear cytochrome c - a mitochondrial visitor regulating damaged chromatin dynamics.  
227 *FEBS Lett* **592**, 172-178 (2018).
- 228 6 Bano, D. & Prehn, J. H. M. Apoptosis-Inducing Factor (AIF) in Physiology and Disease: The  
229 Tale of a Repented Natural Born Killer. *EBioMedicine* **30**, 29-37 (2018).
- 230 7 Kamada, S., Kikkawa, U., Tsujimoto, Y. & Hunter, T. Nuclear translocation of caspase-3 is  
231 dependent on its proteolytic activation and recognition of a substrate-like protein(s). *J Biol*  
232 *Chem* **280**, 857-860 (2005).
- 233 8 Wang, Y. *et al.* A nuclease that mediates cell death induced by DNA damage and poly(ADP-  
234 ribose) polymerase-1. *Science* **354**, aad6872 (2016).
- 235 9 Fernando, P., Kelly, J. F., Balazsi, K., Slack, R. S. & Megeney, L. A. Caspase 3 activity is  
236 required for skeletal muscle differentiation. *Proc Natl Acad Sci U S A* **99**, 11025-11030 (2002).
- 237 10 Toyama, B. H. *et al.* Visualization of long-lived proteins reveals age mosaicism within nuclei  
238 of postmitotic cells. *J Cell Biol* **218**, 433-444 (2019).
- 239 11 Louis, M., Zanou, N., Van Schoor, M. & Gailly, P. TRPC1 regulates skeletal myoblast  
240 migration and differentiation. *J Cell Sci* **121**, 3951-3959 (2008).
- 241 12 Bano, D. *et al.* Alteration of the nuclear pore complex in Ca(2+)-mediated cell death. *Cell*  
242 *Death Differ* **17**, 119-133 (2010).

- 243 13 Hutten, S. & Kehlenbach, R. H. Nup214 is required for CRM1-dependent nuclear protein  
244 export in vivo. *Mol Cell Biol* **26**, 6772-6785 (2006).
- 245 14 Ullman, K. S., Shah, S., Powers, M. A. & Forbes, D. J. The nucleoporin nup153 plays a critical  
246 role in multiple types of nuclear export. *Mol Biol Cell* **10**, 649-664 (1999).
- 247 15 Aksenova, V. *et al.* Nucleoporin TPR is an integral component of the TREX-2 mRNA export  
248 pathway. *Nat Commun* **11**, 4577 (2020).
- 249 16 Forler, D. *et al.* RanBP2/Nup358 provides a major binding site for NXF1-p15 dimers at the  
250 nuclear pore complex and functions in nuclear mRNA export. *Mol Cell Biol* **24**, 1155-1167  
251 (2004).
- 252 17 Schwarzerova, K. *et al.* Tubulin is actively exported from the nucleus through the  
253 Exportin1/CRM1 pathway. *Sci Rep* **9**, 5725 (2019).
- 254 18 Luo, S. W. *et al.* Regulation of heterochromatin remodelling and myogenin expression during  
255 muscle differentiation by FAK interaction with MBD2. *EMBO J* **28**, 2568-2582 (2009).
- 256 19 Alpha, K. M., Xu, W. & Turner, C. E. Paxillin family of focal adhesion adaptor proteins and  
257 regulation of cancer cell invasion. *Int Rev Cell Mol Biol* **355**, 1-52 (2020).
- 258 20 Lim, S. T. *et al.* Nuclear FAK promotes cell proliferation and survival through FERM-enhanced  
259 p53 degradation. *Mol Cell* **29**, 9-22 (2008).
- 260 21 Yi, X., Tesmer, V. M., Savre-Train, I., Shay, J. W. & Wright, W. E. Both transcriptional and  
261 posttranscriptional mechanisms regulate human telomerase template RNA levels. *Mol Cell*  
262 *Biol* **19**, 3989-3997 (1999).
- 263 22 Lee, J. E., Lee, J. Y., Wilusz, J., Tian, B. & Wilusz, C. J. Systematic analysis of cis-elements  
264 in unstable mRNAs demonstrates that CUGBP1 is a key regulator of mRNA decay in muscle  
265 cells. *PLoS One* **5**, e11201 (2010).
- 266 23 Kleinschmidt, E. G. & Schlaepfer, D. D. Focal adhesion kinase signaling in unexpected places.  
267 *Curr Opin Cell Biol* **45**, 24-30 (2017).
- 268 24 Wood, K. H. & Zhou, Z. Emerging Molecular and Biological Functions of MBD2, a Reader of  
269 DNA Methylation. *Front Genet* **7**, 93 (2016).

- 270 25 Skene, P. J. & Henikoff, S. An efficient targeted nuclease strategy for high-resolution mapping  
271 of DNA binding sites. *eLife* **6** (2017).
- 272 26 Brero, A. *et al.* Methyl CpG-binding proteins induce large-scale chromatin reorganization  
273 during terminal differentiation. *J Cell Biol* **169**, 733-743 (2005).
- 274 27 Chong, J. X. *et al.* Mutations in *MYLPP* Cause a Novel Segmental Amyoplasia that Manifests  
275 as Distal Arthrogryposis. *Am J Hum Genet* **107**, 293-310 (2020).
- 276 28 Bustos, F. *et al.* NEDD4 Regulates PAX7 Levels Promoting Activation of the Differentiation  
277 Program in Skeletal Muscle Precursors. *Stem Cells* **33**, 3138-3151 (2015).
- 278 29 Srinivasula, S. M. & Ashwell, J. D. IAPs: what's in a name? *Mol Cell* **30**, 123-135 (2008).
- 279 30 Lee, C. W., Raskett, C. M., Prudovsky, I. & Altieri, D. C. Molecular dependence of estrogen  
280 receptor-negative breast cancer on a notch-survivin signaling axis. *Cancer Res* **68**, 5273-5281  
281 (2008).
- 282 31 Liu, W. H., Hsiao, H. W., Tsou, W. I. & Lai, M. Z. Notch inhibits apoptosis by direct interference  
283 with XIAP ubiquitination and degradation. *EMBO J* **26**, 1660-1669 (2007).
- 284 32 Wolan, D. W., Zorn, J. A., Gray, D. C. & Wells, J. A. Small-molecule activators of a proenzyme.  
285 *Science* **326**, 853-858 (2009).
- 286 33 Nakahara, T. *et al.* YM155, a novel small-molecule survivin suppressant, induces regression  
287 of established human hormone-refractory prostate tumor xenografts. *Cancer Res* **67**, 8014-  
288 8021 (2007).
- 289 34 Guicciardi, M. E. *et al.* Cellular inhibitor of apoptosis 1 (cIAP-1) degradation by caspase 8  
290 during TNF-related apoptosis-inducing ligand (TRAIL)-induced apoptosis. *Exp Cell Res* **317**,  
291 107-116 (2011).
- 292 35 Hornle, M. *et al.* Caspase-3 cleaves XIAP in a positive feedback loop to sensitize melanoma  
293 cells to TRAIL-induced apoptosis. *Oncogene* **30**, 575-587 (2011).
- 294 36 Nakanishi, K., Sudo, T. & Morishima, N. Endoplasmic reticulum stress signaling transmitted  
295 by ATF6 mediates apoptosis during muscle development. *J Cell Biol* **169**, 555-560 (2005).

- 296 37 Morishima, N., Nakanishi, K., Takenouchi, H., Shibata, T. & Yasuhiko, Y. An endoplasmic  
297 reticulum stress-specific caspase cascade in apoptosis. Cytochrome c-independent activation  
298 of caspase-9 by caspase-12. *J Biol Chem* **277**, 34287-34294 (2002).
- 299 38 Yoneda, T. *et al.* Activation of caspase-12, an endoplasmic reticulum (ER) resident caspase,  
300 through tumor necrosis factor receptor-associated factor 2-dependent mechanism in  
301 response to the ER stress. *J Biol Chem* **276**, 13935-13940 (2001).
- 302 39 Armand, A. S. *et al.* Cooperative synergy between NFAT and MyoD regulates myogenin  
303 expression and myogenesis. *J Biol Chem* **283**, 29004-29010 (2008).
- 304 40 Kato, K. *et al.* Protein kinase C stabilizes X-linked inhibitor of apoptosis protein (XIAP) through  
305 phosphorylation at Ser(87) to suppress apoptotic cell death. *Psychogeriatr* **11**, 90-97 (2011).
- 306 41 Afroze, D. & Kumar, A. ER stress in skeletal muscle remodeling and myopathies. *FEBS J* **286**,  
307 379-398 (2019).
- 308 42 Cho, U. H. & Hetzer, M. W. Nuclear Periphery Takes Center Stage: The Role of Nuclear Pore  
309 Complexes in Cell Identity and Aging. *Neuron* **106**, 899-911 (2020).
- 310 43 Dick, S. A. *et al.* Caspase 3 cleavage of Pax7 inhibits self-renewal of satellite cells. *Proc Natl*  
311 *Acad Sci U S A* **112**, E5246-5252 (2015).
- 312 44 Bell, R. A. V. *et al.* Chromatin reorganization during myoblast differentiation involves the  
313 caspase-dependent removal of SATB2. *bioRxiv* (2019).
- 314

**Fig. 1 | Caspases proteolyze peripheral Nups during myogenesis (+ Extended Data Fig. 1)**

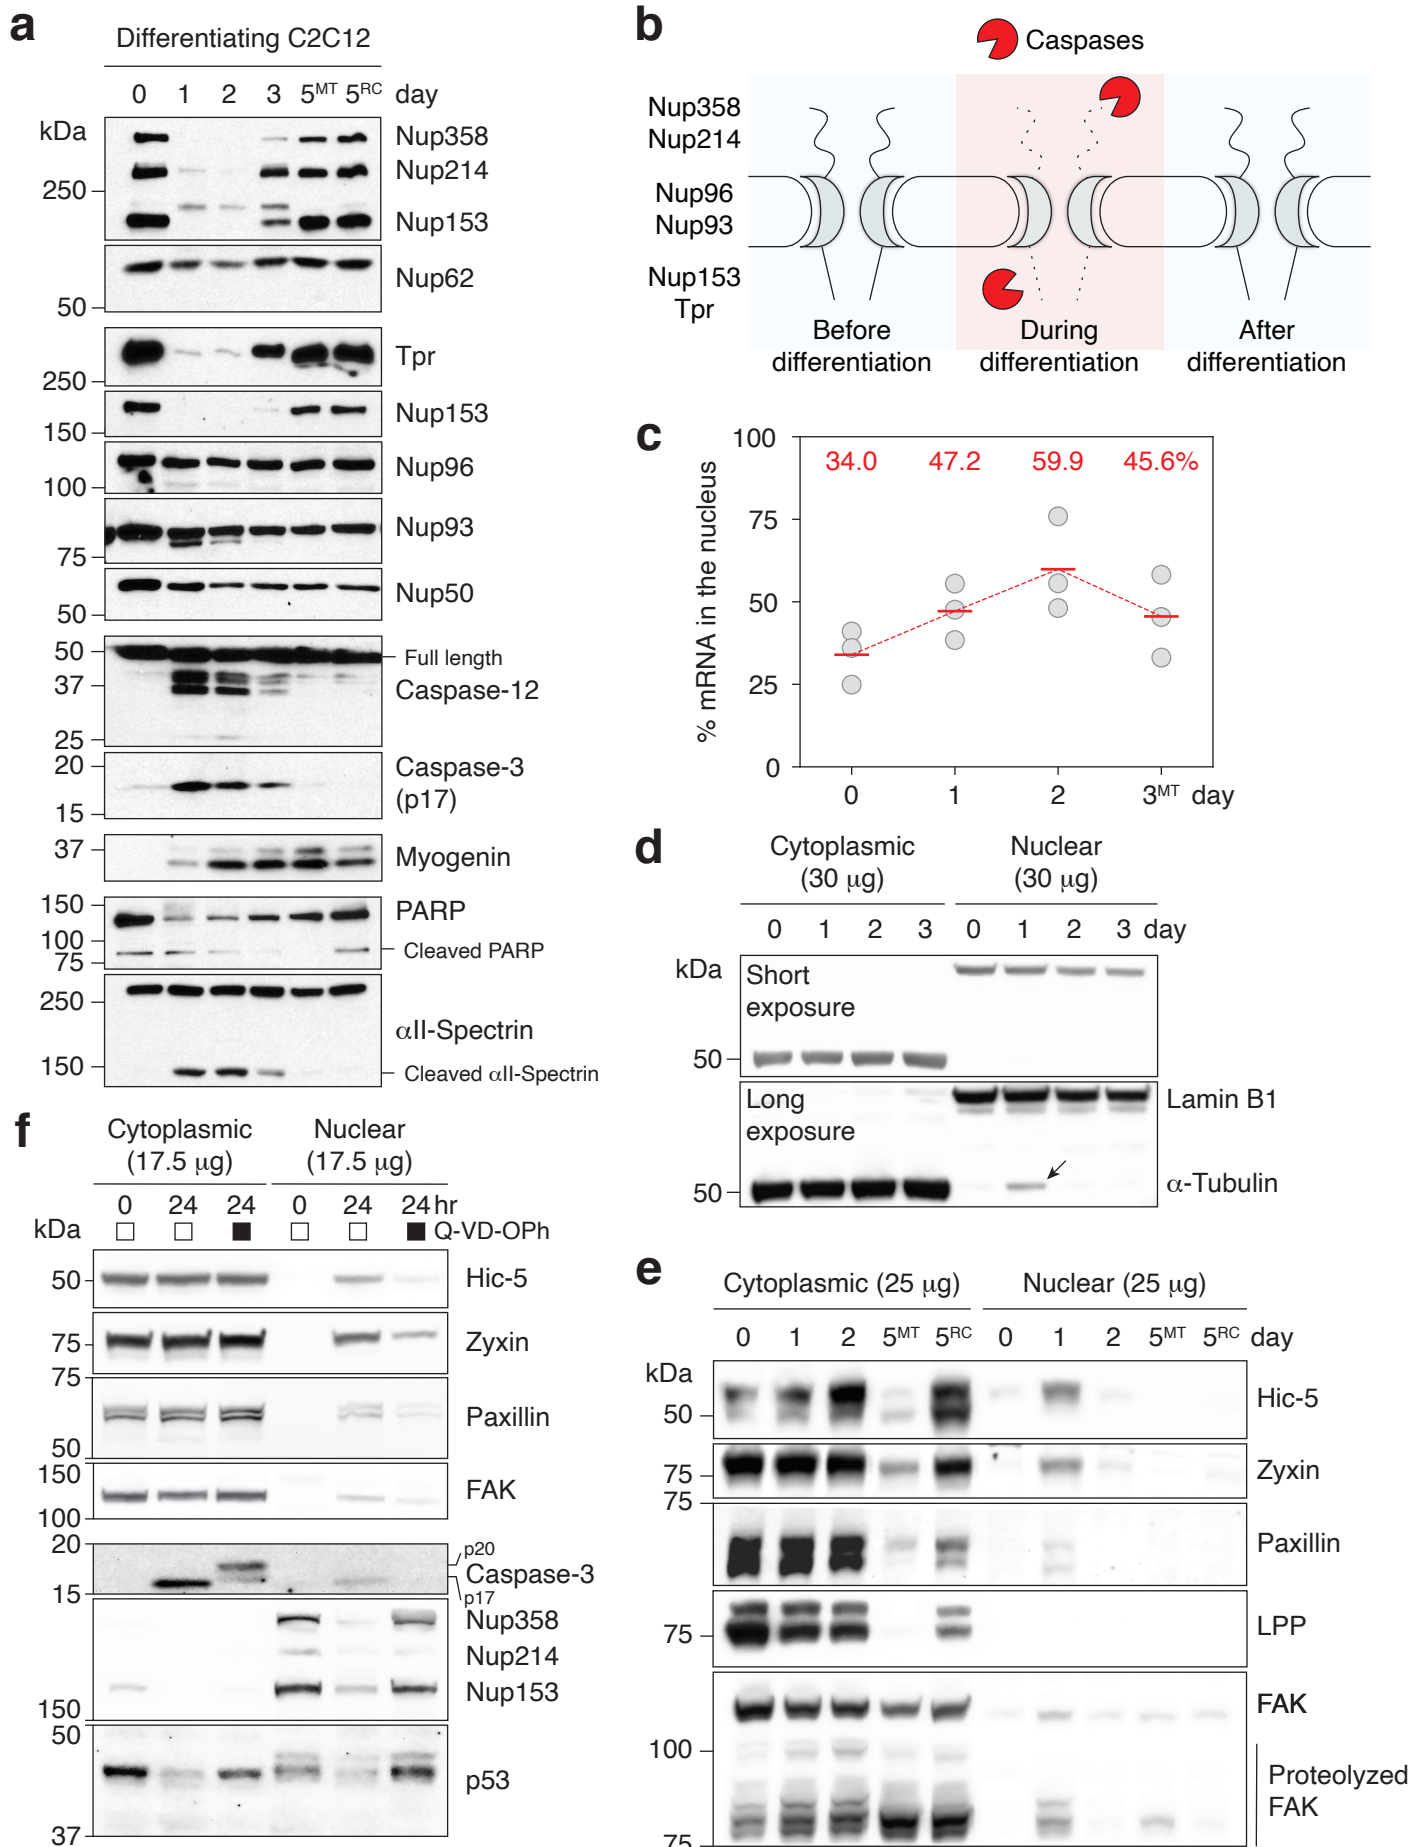

**Fig. 2** | Transient nuclear retention of FAK resets MBD2-mediated genome regulation during myogenesis (+ **Extended Data Fig. 2-4**)

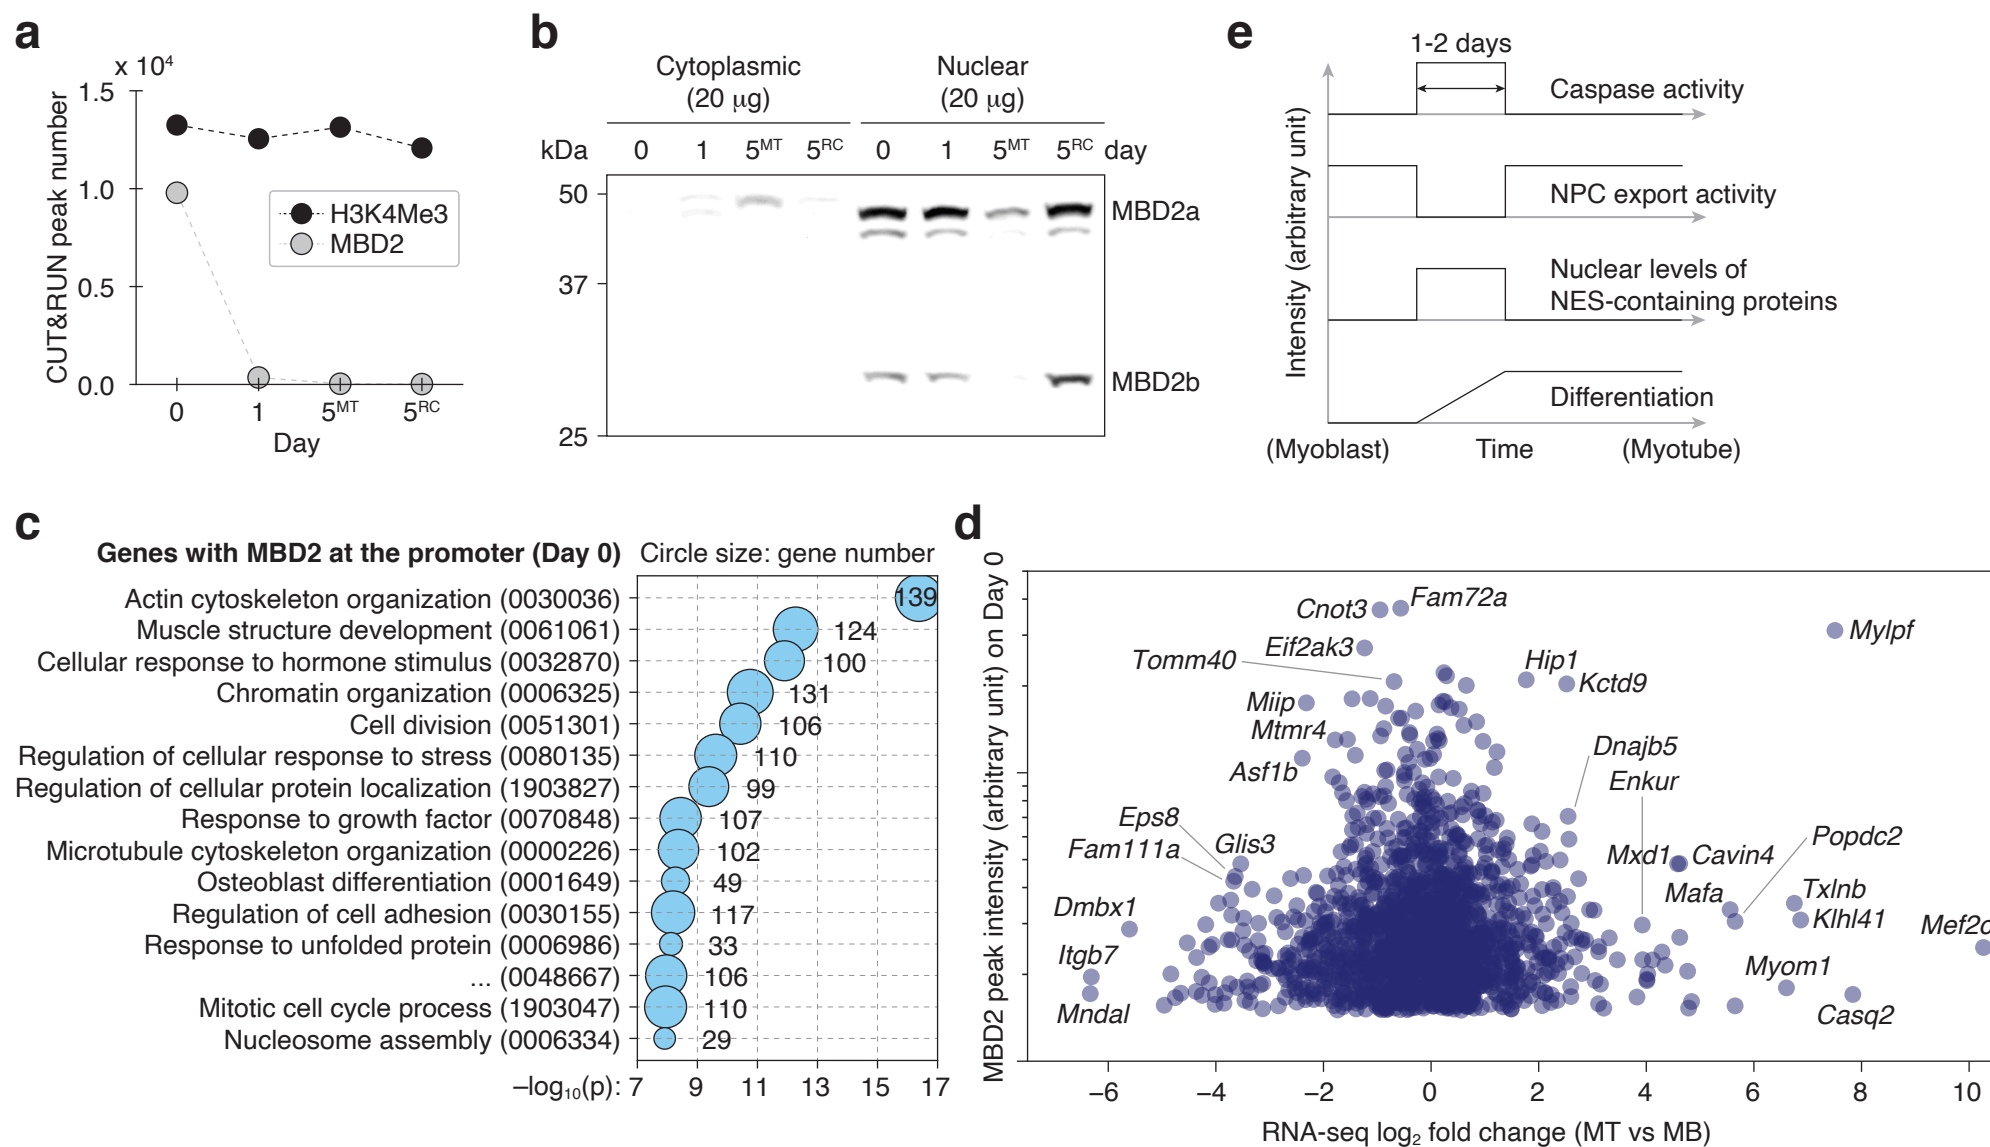



**Fig. 3 | Caspase activation integrates multiple pathways for myogenin upregulation (+ Extended Data Fig. 5)**

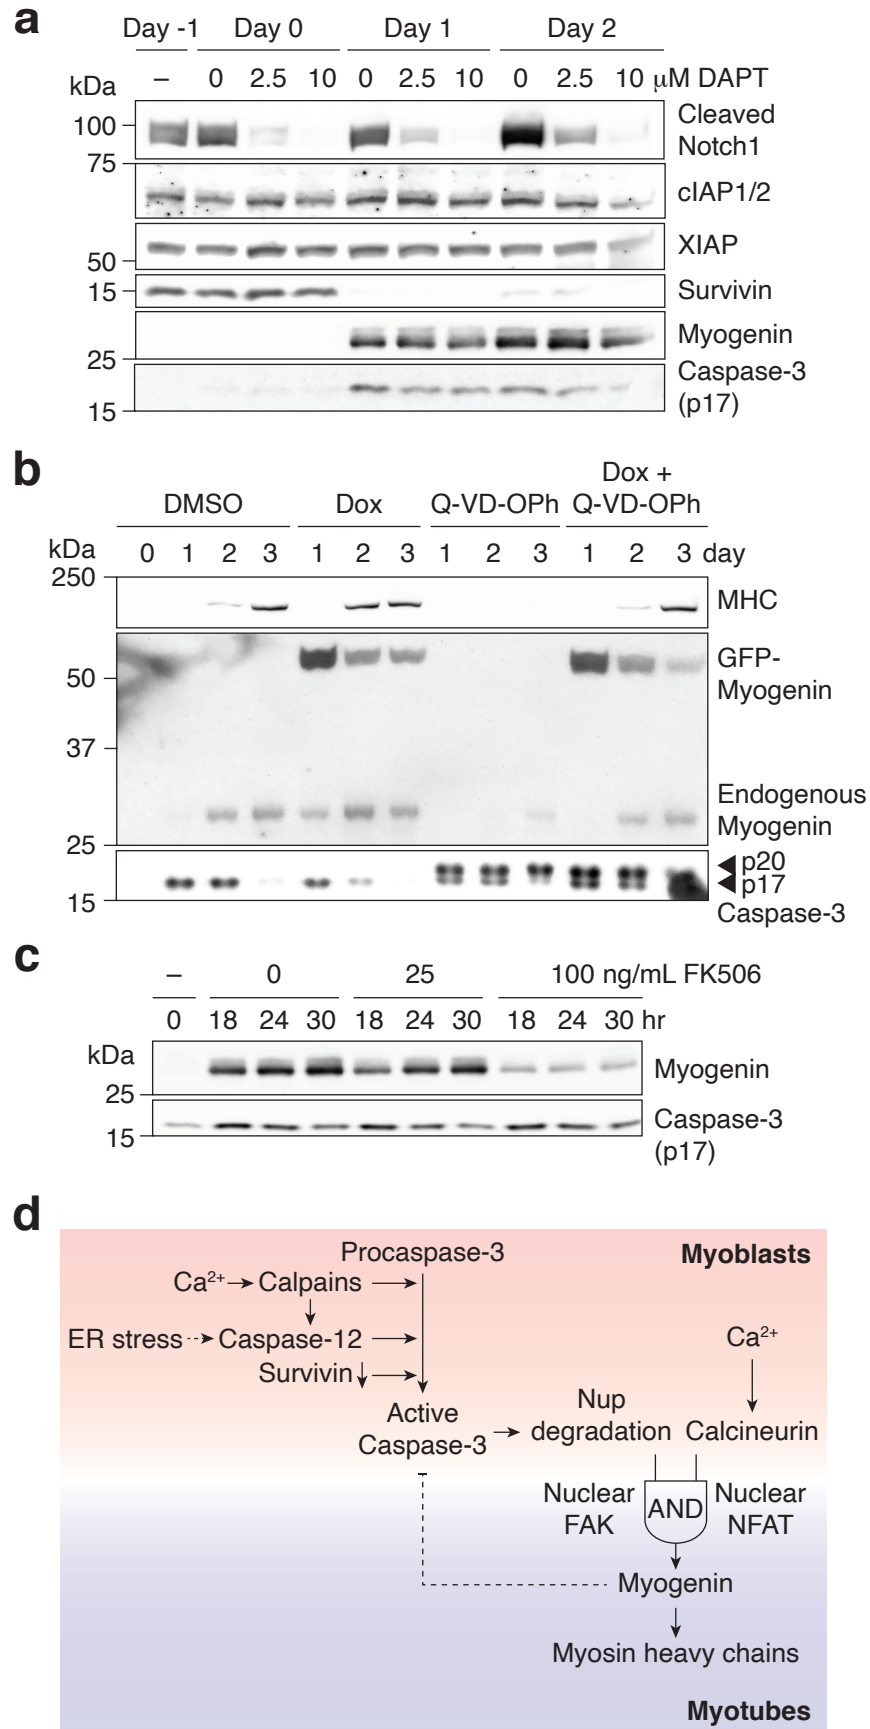



**Fig. 4 | Caspase-mediated NPC trimming occurs during neurogenesis and ER stress**

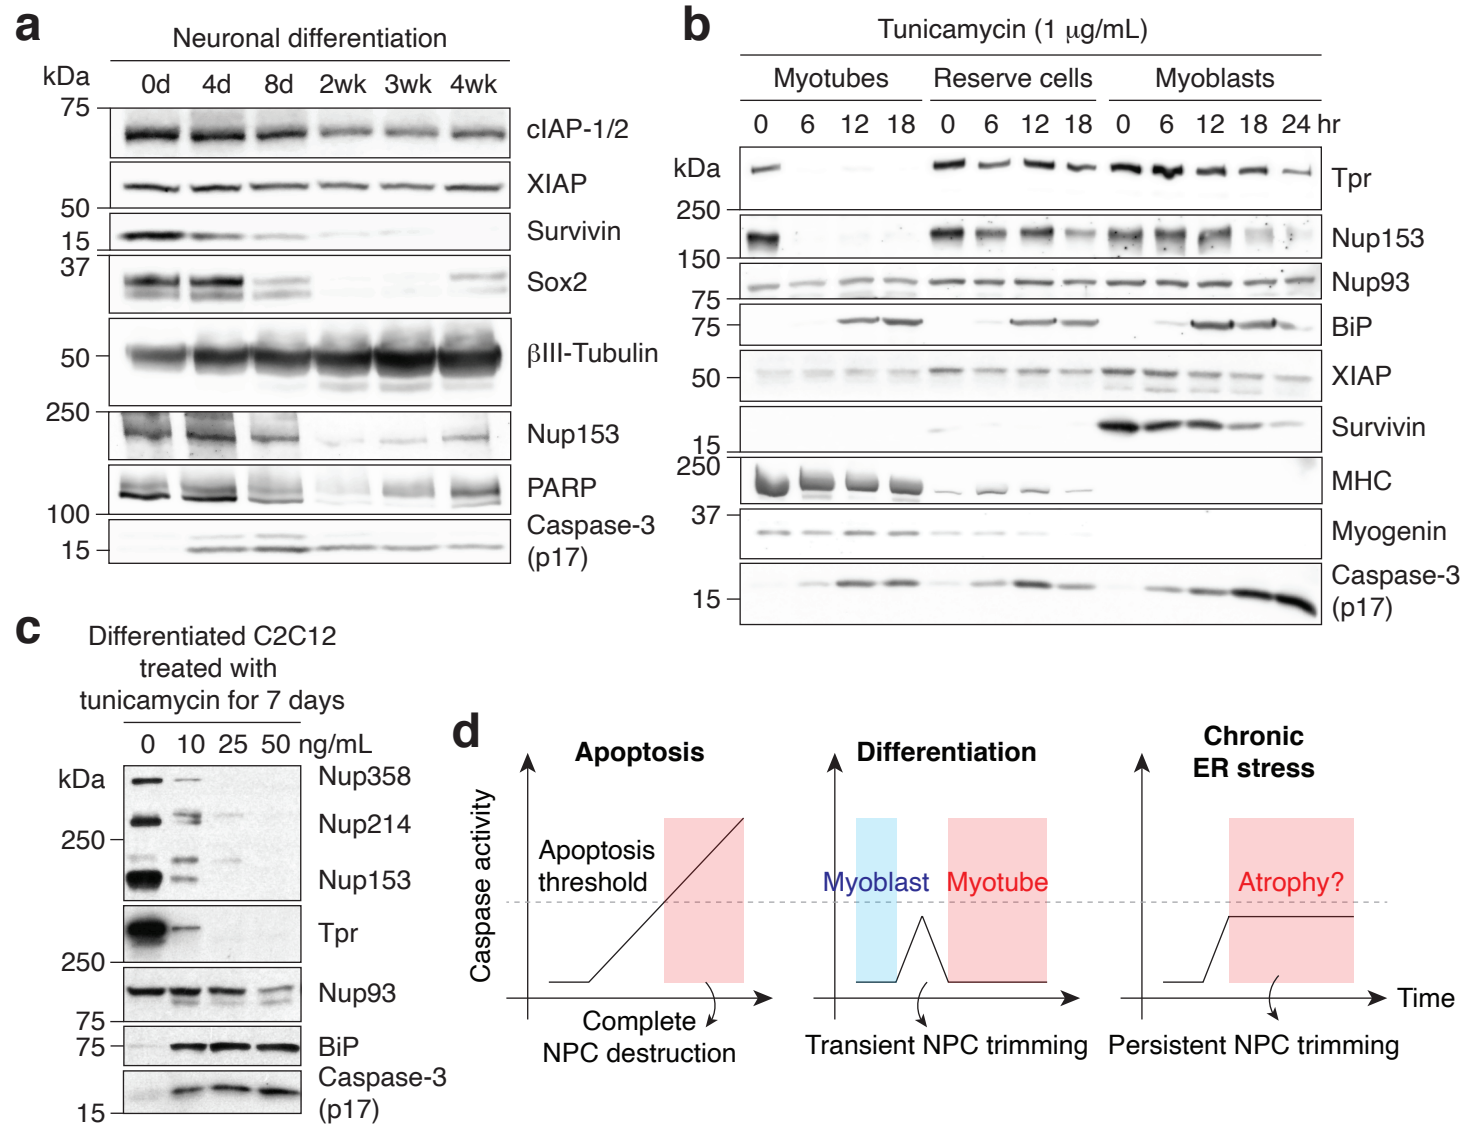

## Figure Legends

**Figure 1 | Caspases proteolyze peripheral Nups during myogenesis.** **a**, Immunoblots showing the degradation of Nups, PARP, and  $\alpha$ II-spectrin, the proteolytic activation of caspase-3 and -12, and the upregulation of myogenin in differentiating C2C12. MT: myotubes, RC: reserve cells. **b**, Schematic representation of caspase-mediated NPC trimming during myogenic differentiation. **c**, Nuclear-to-total mRNA ratio in C2C12 cells undergoing myoblast-to-myotube transition. In red is the average value of three replicates from each point. **d**, Localization of lamin B1 and  $\alpha$ -tubulin in differentiating C2C12 cells was assessed by immunoblotting. Nuclear  $\alpha$ -tubulin is marked with an arrow. 30  $\mu$ g of protein from cytoplasmic or nuclear lysate was loaded to each lane. **e**, Cytoplasmic and nuclear levels of NES-containing focal adhesion proteins in differentiating C2C12 cells were assessed by immunoblotting. For both cytoplasmic and nuclear fractions, 25  $\mu$ g of protein was loaded per lane. **f**, C2C12 cells were differentiated in the absence or presence of a pan-caspase inhibitor, Q-VD-Oph (30  $\mu$ M) for 24 hours, and nuclear and cytoplasmic fractions were obtained. Nuclear accumulation of NES-containing focal adhesion proteins, caspase-mediated NPC trimming, and p53 degradation were examined by western blotting. 17.5  $\mu$ g of cytoplasmic or nuclear protein was loaded per lane.

**Figure 2 | Transient nuclear retention of FAK resets MBD2-mediated genome regulation during myogenesis.** **a**, The number of MBD2 and H3K4Me3 CUT&RUN peaks in differentiating C2C12 cells. **b**, Cytoplasmic and nuclear levels of MBD2 in differentiating C2C12 cells were determined by western blotting. 20  $\mu$ g of protein was loaded per lane. **c**, GO analysis of the genes whose promoters are bound with MBD2 in confluent myoblasts (day 0). In parentheses are seven-digit GO IDs. GO ID 0048667 corresponds to “cell morphogenesis involved in neuron differentiation”. **d**, Transcriptional changes after MBD2 is removed from the promoter of respective genes. Y-axis denotes MBD2 CUT&RUN peak intensity in confluent myoblasts (day 0). **e**, Schematic representation of caspase activation and downstream events that take place during myogenesis.

**Figure 3 | Caspase activation integrates multiple pathways for myogenin upregulation.** **a**, Immunoblots showing the expression levels of cleaved Notch1, caspase-inhibiting proteins (cIAP1/2, XIAP, and survivin), myogenin, and active caspase-3 (p17) in C2C12 cells. DAPT was added at 0, 2.5, or 10  $\mu$ M on day -1, and maintained throughout differentiation. **b**, C2C12 stable

cell line that expresses GFP-myogenin in a doxycycline-dependent manner was differentiated in the absence or presence of 0.5  $\mu$ M doxycycline and/or 30  $\mu$ M Q-VD-OPh. Myosin heavy chain (MHC), exogenous and endogenous myogenin, and caspase-3 (active p17 and inactive p20) levels were determined by immunoblotting. **c**, Upregulation of myogenin and formation of caspase-3 p17 were evaluated in the presence of 0, 25, or 100 ng/mL FK506 by immunoblotting. **d**, A working model for caspase activation, peripheral Nup degradation, and myogenin upregulation during myoblast-to-myotube conversion.

**Figure 4 | Caspase-mediated NPC trimming occurs during neurogenesis and ER stress. a**, Expression levels of caspase-inhibiting proteins (cIAP-1/2, XIAP, survivin), neuronal differentiation markers (Sox2 and  $\beta$ III-tubulin), caspase substrates (Nup153 and PARP), and active caspase-3 (p17) in differentiating neurons were determined by western blotting. **b**, Acute ER stress was induced using 1  $\mu$ g/mL tunicamycin in C2C12 myotubes, reserve cells, and myoblasts, and the levels of Nups, BiP, caspase-inhibiting proteins (cIAP-1/2 and XIAP), myosin heavy chain (MHC), myogenin, and active caspase-3 (p17) were monitored by immunoblotting. **c**, Chronic ER stress was induced in differentiated C2C12 cells for 7 days using low doses of tunicamycin (0, 10, 25, or 50 ng/mL). The integrity of Nups and the induction of BiP and active caspase-3 (p17) were assessed by immunoblotting. **d**, Schematic representation illustrating caspase activation and NPC proteolysis patterns in apoptosis, cell differentiation, and ER stress.

## Methods

**Antibodies and chemicals.** Primary and secondary antibodies and chemicals used in this study are summarized in **Supplementary Table 2, 3, and 4**.

**Immunoblot techniques.** Cultured cells were washed with phosphate-buffered saline (PBS) and harvested by trypsinization. Cell pellet was washed with PBS, and lysed in RIPA buffer (50 mM Tris-HCl pH 7.5, 150 mM NaCl, 1% Triton X100, 0.5% sodium deoxycholate, 0.1% sodium dodecyl sulfate) containing protease and phosphatase inhibitors (Pierce Protease Inhibitor Mini Tablet, EDTA-free, Thermo Scientific; PhosSTOP, Roche) for 45 minutes at 4°C. Insoluble material was pelleted at 16,000 x g at 4°C for 20 minutes. 15-30 µg of total protein per sample were added 6x Laemmli sample buffer, boiled for 4 minutes, and loaded on a Tris or Bis-tris gel for electrophoresis. Proteins were transferred to a nitrocellulose membrane and stained with Ponceau S solution to confirm equal protein loading and successful transfer. After washing with Tris-buffered saline containing 0.05% (w/v) Tween 20 (TBST) several times, the membrane was blocked with 5% non-fat milk powder in TBST for an hour at room temperature, and subsequently immunoblotted at 4°C overnight with primary antibodies listed in **Supplementary Table 2**. Chemiluminescent detection was conducted using either SuperSignal West Pico or Femto kits (Thermo Scientific) after 45-minute incubation with secondary antibodies listed in **Supplementary Table 3** at room temperature. Western blot images were obtained using KwikQuant Imager (Kindle Biosciences) or Odyssey CLx (LI-COR).

**Cloning.** Vectors, PCR templates, and PCR primers used in this study are listed in **Supplementary Table 5**. In-fusion cloning was performed using the In-Fusion HD EcoDry Cloning Plus kit (Takara), and standard cut-and-paste cloning using T7 DNA ligase (New England Biolabs).

**Cell culture.** C2C12 and HCT116 cells were obtained from ATCC. C2C12 cells were cultured in Dulbecco's Modified Eagle Medium (DMEM) supplemented with 20% fetal bovine serum and penicillin-streptomycin. For myogenic differentiation, they were grown to confluency, washed with PBS twice, and added DMEM with 2% horse serum and the same antibiotics. C2C12 differentiation medium was replenished every 24 or 48 hours. After 120 hours, mature myotubes and reserve cells were obtained. Myotubes were harvested with minimal contamination of reserve cells by mild trypsinization (1:3 or 1:4 dilution of trypsin in PBS). HCT116 cells were cultured in

McCoy's 5A Medium supplemented with 10% fetal bovine serum and penicillin-streptomycin. H9 embryonic stem cells were differentiated to neural precursor cells using a previously published method<sup>45</sup>. Purified neural precursor cells were cultured in neurogenic conditions (DMEM/F12 based medium with 1x N2, 1x B27, 20ng/mL GDNF, 20ng/mL BDNF, 1mM cAMP, and 200nM ascorbic acid) for 4 weeks to generate mature post-mitotic neurons.

**C2C12 cell fractionation.** Cells were harvested by trypsinization, washed with PBS, and chilled on ice. Cells were then lysed in ice-cold 0.1% NP40 in PBS, and rotated at 4°C for 10 minutes. Nuclei were pelleted by centrifugation at 500 x g at 4°C for 4 minutes, and the supernatant (cytoplasmic fraction) was transferred to a fresh tube and stored at -80°C until use. Nuclei were again resuspended in ice-cold 0.1% NP40 in PBS, rotated at 4°C for 5 minutes, and pelleted at 500 x g at 4°C for 4 minutes. The supernatant was discarded, and the pellet (nuclear fraction) was stored at -80°C until use.

**Lentivirus packaging, infection, and selection.** Third-generation lentiviral protocol was followed to produce virus in HEK293T cells (obtained from the Salk Stem Cell Core Facility). C2C12 cells were infected with viral supernatant at 30-40% confluency in the presence of 6 µg/mL polybrene for 24 hours, and selected 24 hours after infection with 1 mg/mL puromycin.

**RNA fluorescence *in situ* hybridization (FISH).** C2C12 cells were grown on a No. 1.5 coverslip placed in a 12-well cell culture plate. After removing media, cells were washed with PBS, and fixed in 3.7% paraformaldehyde in PBS for 10 minutes at room temperature. Fixed cells were washed with PBS twice and permeabilized in 70% (vol/vol) ethanol at 4°C for at least a day. We then followed Stellaris RNA FISH protocol for adherent cells (<https://www.biosearchtech.com/support/resources/stellaris-protocols>) to fluorescently visualize RNAs. Fluorescent images were obtained using a Leica SP8 confocal microscope equipped with a 63x oil-immersion objective. Images were cropped and pseudocolored using FIJI. See **Supplementary Table 6** for RNA FISH probes used in this study.

**Immunofluorescence.** C2C12 cells were grown on a chambered cell culture slide (Ibidi). Cells were fixed in PBS containing 2% paraformaldehyde for 10 minutes at room temperature, and washed with PBS 3 times. Fixed cells were permeabilized and blocked in immunofluorescence buffer (PBS containing 0.1% Triton-X, 0.02% sodium dodecyl sulfate, and 10 mg/mL bovine serum albumin) for 30 minutes. The cells were then incubated with primary antibodies diluted in

immunofluorescence buffer at room temperature for 2 hours, washed 3 times with immunofluorescence buffer, and incubated with the appropriate secondary antibodies diluted in immunofluorescence buffer at room temperature for 45 minutes. Finally, the cells were washed with immunofluorescence buffer 3 times, and added VECTASHIELD antifade mounting medium with DAPI (Vector Laboratories). Fluorescent images were obtained using a Leica SP8 confocal microscope equipped with a 63x oil-immersion objective. Images were cropped and pseudocolored using FIJI. See **Supplementary Table 2 and 3** for antibodies used for immunofluorescence.

**Poly(A)<sup>+</sup> RNA quantification.** Poly(A)<sup>+</sup> RNA was isolated from nuclei and whole cells (see C2C12 cell fractionation above) using the Magnetic mRNA Isolation Kit (New England Biolabs). Two rounds of binding, washing, and elution were performed. Eluted RNA was quantified via Qubit RNA HS Assay (Invitrogen).

**MBD2 CUT&RUN-sequencing.** 300-400 thousand cells were used for each CUT&RUN-sequencing reaction. C2C12 cells were harvested by trypsinization, washed in PBS, and stored in fetal bovine serum supplemented with 10% dimethyl sulfoxide until use. MBD2-bound genomic fragments were prepared using the CUT&RUN assay kit (Cell Signaling Technology, 86652). MBD2 antibody (Sigma, M7318) was used at 10 µg/mL. Sequencing libraries were prepared using NEBNext Ultra II DNA library prep kit for Illumina and NEBNext Multiplex Oligos for Illumina (New England Biolabs, E7645 and E7600). Libraries were quantified and analyzed using Qubit dsDNA HS assay kit (Thermo Fisher Scientific) and a TapeStation 2200 with high-sensitivity DNA kit (Agilent). Libraries were sequenced in paired-end 150 base pair mode on the Illumina NovaSeq 6000 platform. Paired-end fragments were trimmed, mapped to the mm10 genome, and filtered using Trim Galore (<https://github.com/FelixKrueger/TrimGalore>), Bowtie2<sup>46</sup>, and SAMtools<sup>47</sup>, respectively. Peaks were identified using MACS2<sup>48</sup> and further filtered and analyzed with in-house Python scripts that leveraged pyBigWig (<https://github.com/deeptools/pyBigWig>) and pyBedTools<sup>49</sup> packages. GO term analyses (biological processes) were performed on <http://metascape.org><sup>50</sup>. Genomic annotation of the peaks was conducted using CHIPseeker<sup>51</sup>. CUT&RUN-sequencing data were plotted using karyoploteR<sup>52</sup>.

**mRNA-sequencing.** 1-2 million C2C12 cells were lysed in 1 ml TRIzol. 0.4 ml chloroform was added and vigorously shaken for RNA extraction. The aqueous phase was transferred to a fresh tube, and one volume of 70% ethanol was added dropwise while vortexing at the lowest speed at

room temperature. The mixture was purified using RNeasy Mini kit (Qiagen) to yield several hundred ng/ $\mu$ L total RNA. mRNA-sequencing was performed in paired-end 150 base pair mode on the Illumina NovaSeq 6000 platform. Paired-end fragments were mapped to mm10, filtered, and assembled into transcripts using HISAT2<sup>53</sup>, SAMtools<sup>47</sup>, and StringTie<sup>54</sup>. Differential expression was evaluated using DESeq2<sup>55</sup>, and further analyzed with in-house python scripts.



## References

- 45 Marchetto, M. C. *et al.* Altered proliferation and networks in neural cells derived from idiopathic autistic individuals. *Mol Psychiatry* **22**, 820-835 (2017).
- 46 Langmead, B. & Salzberg, S. L. Fast gapped-read alignment with Bowtie 2. *Nat Methods* **9**, 357-359 (2012).
- 47 Li, H. *et al.* The Sequence Alignment/Map format and SAMtools. *Bioinformatics* **25**, 2078-2079 (2009).
- 48 Zhang, Y. *et al.* Model-based analysis of ChIP-Seq (MACS). *Genome Biol* **9**, R137 (2008).
- 49 Dale, R. K., Pedersen, B. S. & Quinlan, A. R. Pybedtools: a flexible Python library for manipulating genomic datasets and annotations. *Bioinformatics* **27**, 3423-3424 (2011).
- 50 Zhou, Y. *et al.* Metascape provides a biologist-oriented resource for the analysis of systems-level datasets. *Nat Commun* **10**, 1523 (2019).
- 51 Yu, G., Wang, L. G. & He, Q. Y. ChIPseeker: an R/Bioconductor package for ChIP peak annotation, comparison and visualization. *Bioinformatics* **31**, 2382-2383 (2015).
- 52 Gel, B. & Serra, E. karyoploteR: an R/Bioconductor package to plot customizable genomes displaying arbitrary data. *Bioinformatics* **33**, 3088-3090 (2017).
- 53 Kim, D., Paggi, J. M., Park, C., Bennett, C. & Salzberg, S. L. Graph-based genome alignment and genotyping with HISAT2 and HISAT-genotype. *Nat Biotechnol* **37**, 907-915 (2019).
- 54 Pertea, M. *et al.* StringTie enables improved reconstruction of a transcriptome from RNA-seq reads. *Nat Biotechnol* **33**, 290-295 (2015).
- 55 Love, M. I., Huber, W. & Anders, S. Moderated estimation of fold change and dispersion for RNA-seq data with DESeq2. *Genome Biol* **15**, 550 (2014).
